# Supplementary material for: Gsslasso Cox: a Bayesian hierarchical model for predicting survival and detecting associated genes by incorporating pathway information
Source: Springer Nature journal article supplement (doi:10.1186/s12859-019-2656-1), 2019-02-27

Results for ovarian cancer by different methods

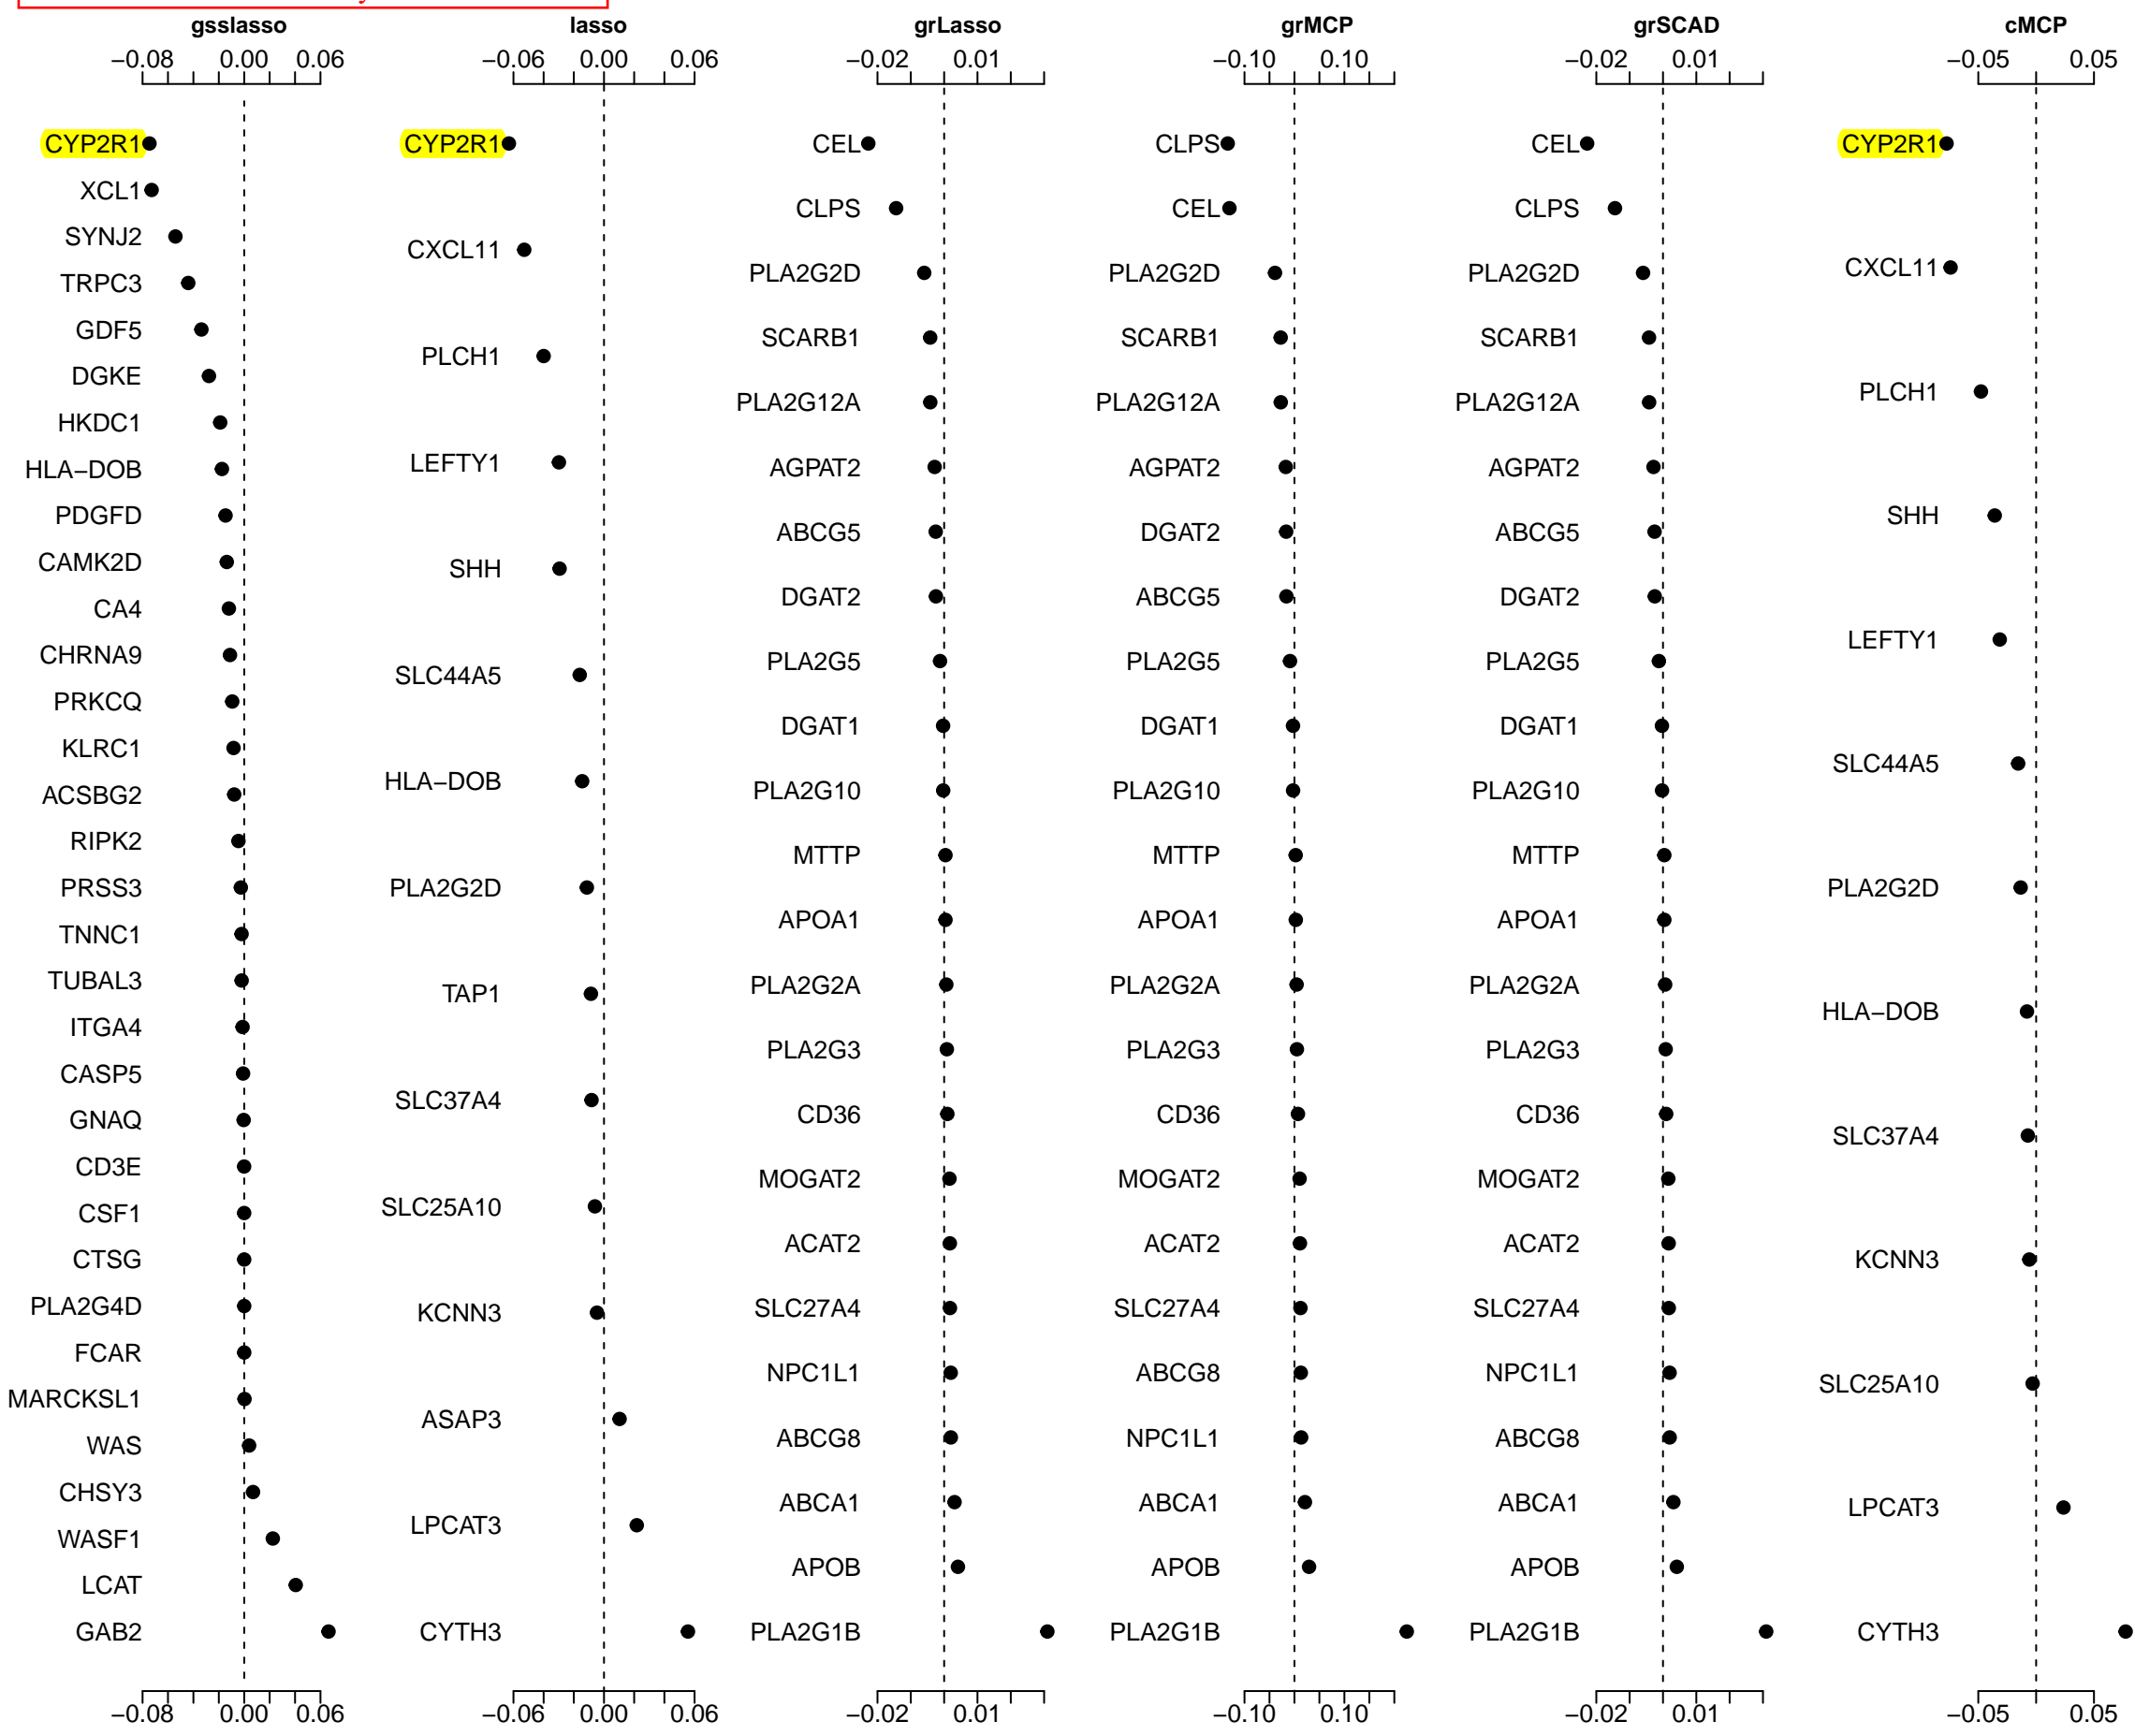

Results for lung cancer by different methods

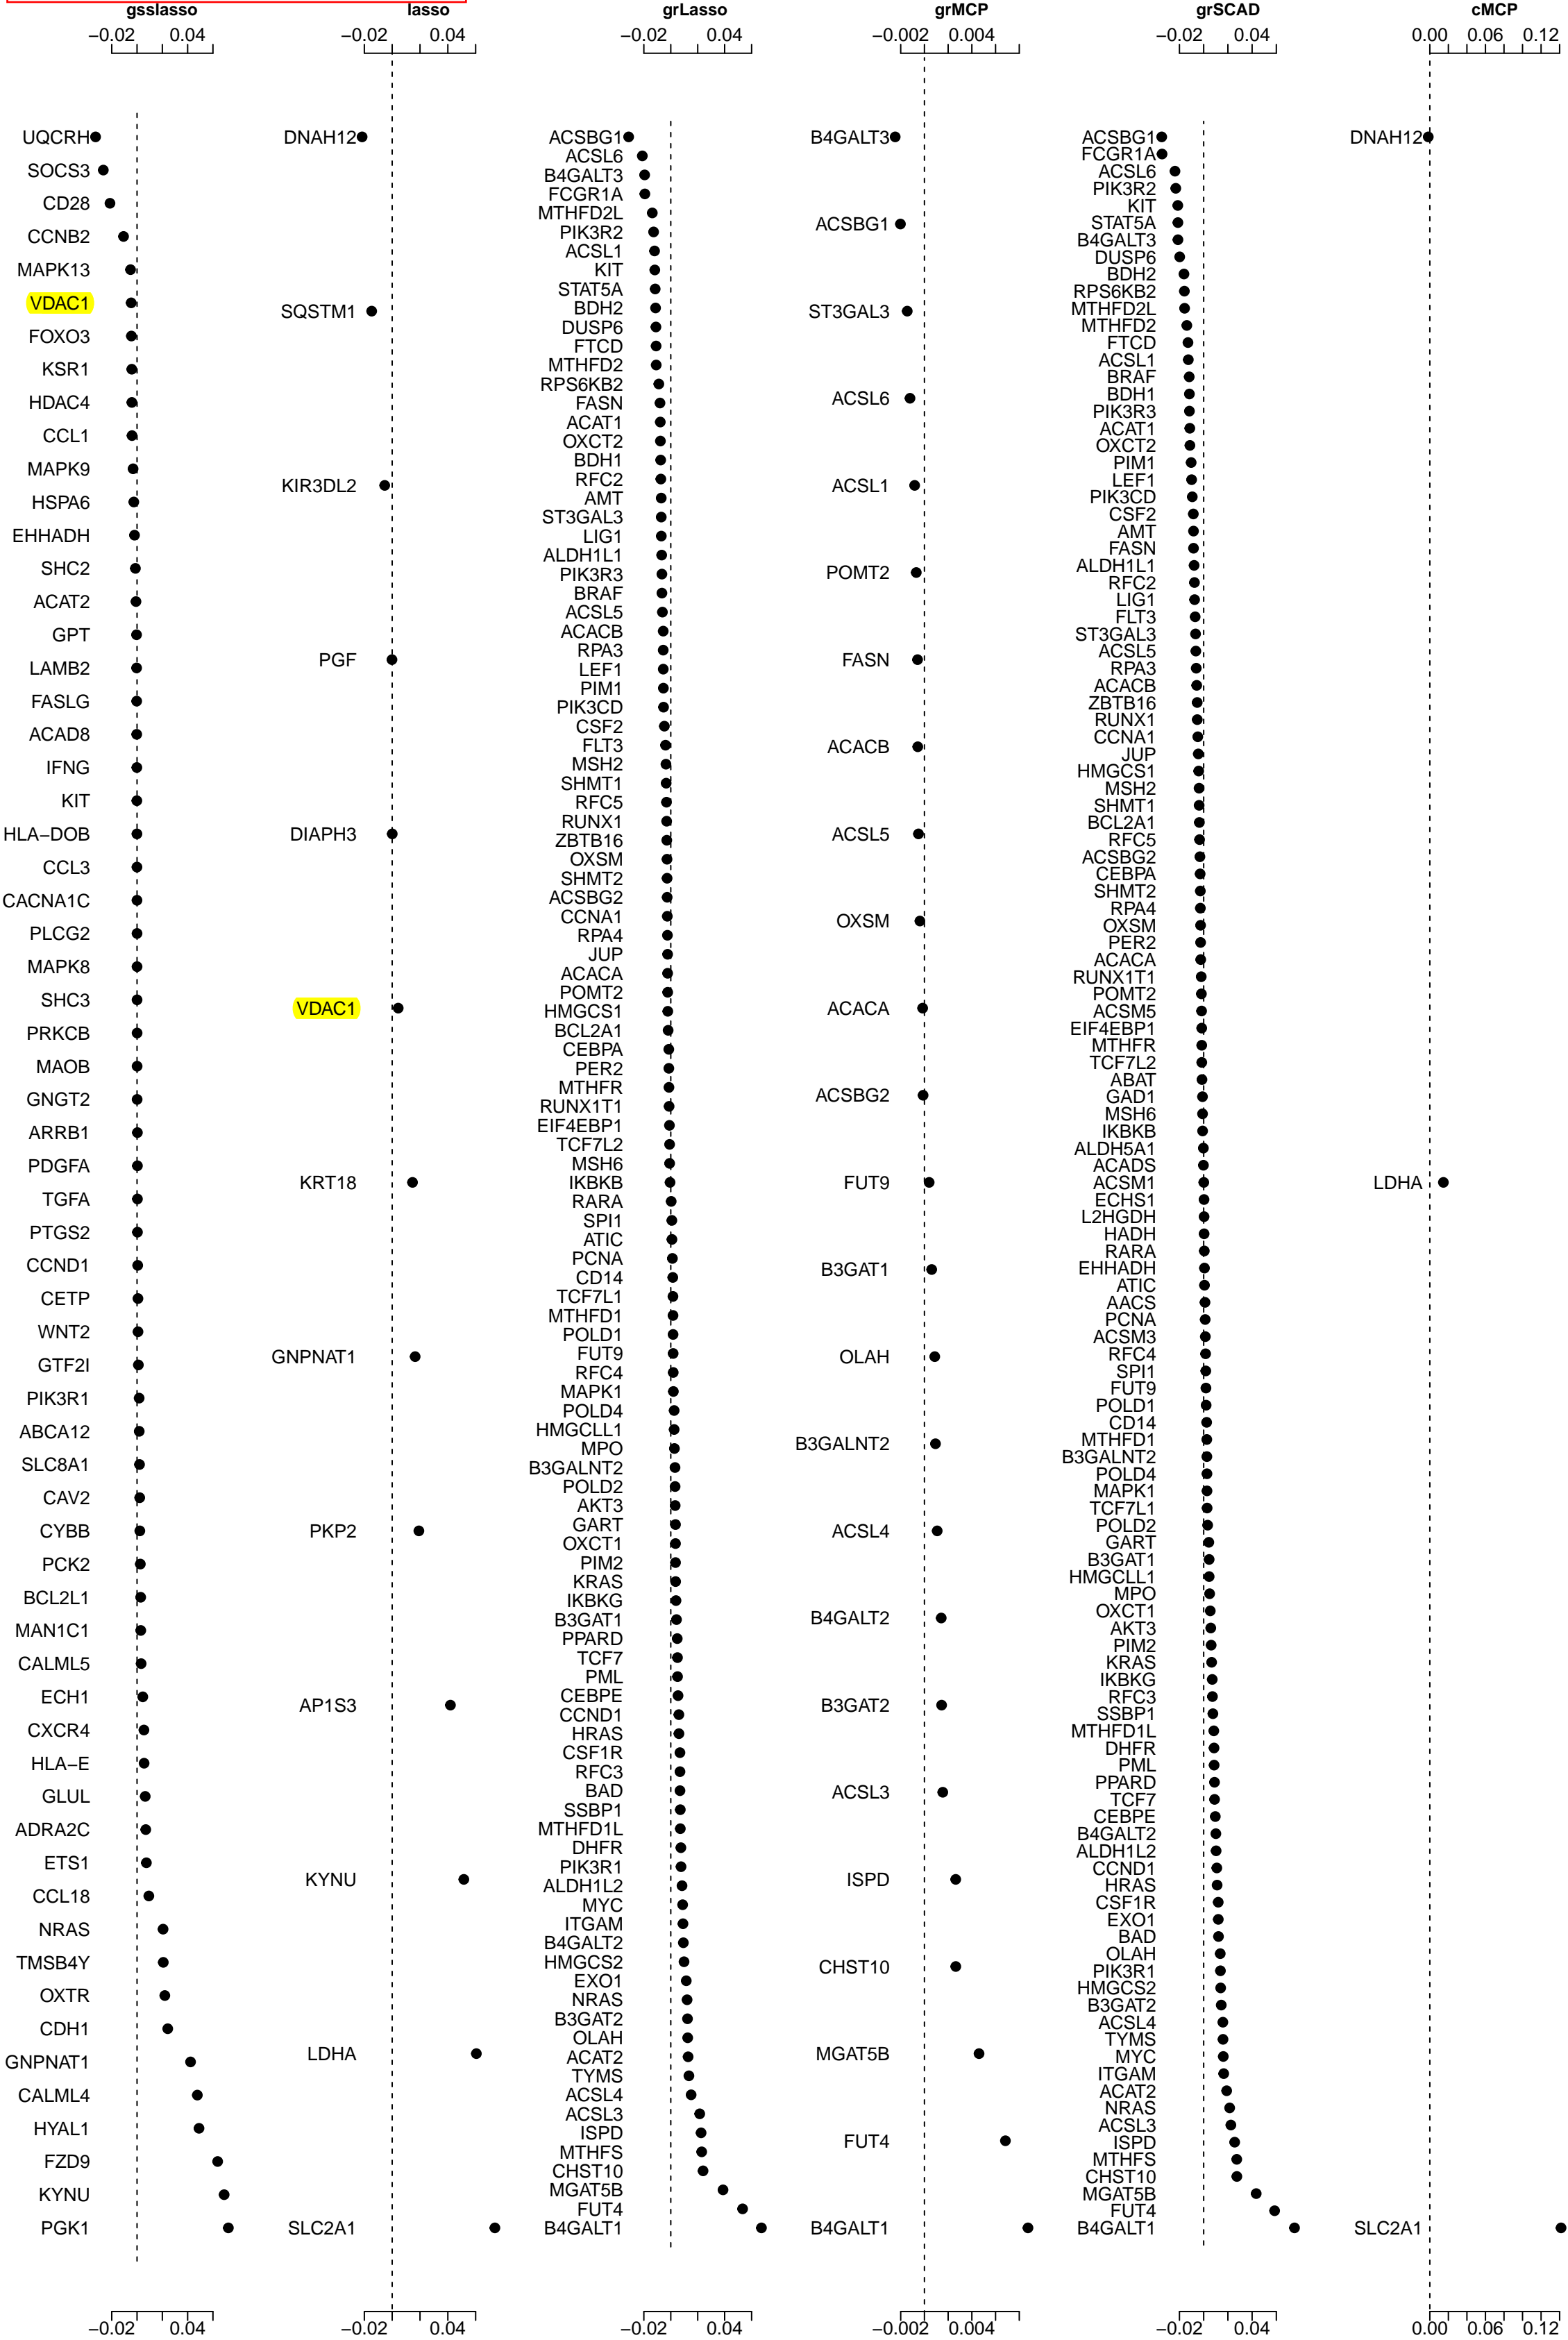

Supplement: 12859_2019_2656_MOESM11_ESM.pdf [file 12859_2019_2656_MOESM11_ESM.pdf]
